# Supplementary material for: ZNF827 is a single-stranded DNA binding protein that regulates the ATR-CHK1 DNA damage response pathway
Source: PubMed Central journal article supplement (PMC10933417; doi:10.1038/s41467-024-46578-0), 2024-03-12

## Reporting Summary

Nature Portfolio wishes to improve the reproducibility of the work that we publish. This form provides structure for consistency and transparency in reporting. For further information on Nature Portfolio policies, see our [Editorial Policies](#) and the [Editorial Policy Checklist](#).

Please do not complete any field with "not applicable" or n/a. Refer to the help text for what text to use if an item is not relevant to your study. For final submission: please carefully check your responses for accuracy; you will not be able to make changes later.

### Statistics

For all statistical analyses, confirm that the following items are present in the figure legend, table legend, main text, or Methods section.

n/a Confirmed

- The exact sample size ( $n$ ) for each experimental group/condition, given as a discrete number and unit of measurement
- A statement on whether measurements were taken from distinct samples or whether the same sample was measured repeatedly
- The statistical test(s) used AND whether they are one- or two-sided  
*Only common tests should be described solely by name; describe more complex techniques in the Methods section.*
- A description of all covariates tested
- A description of any assumptions or corrections, such as tests of normality and adjustment for multiple comparisons
- A full description of the statistical parameters including central tendency (e.g. means) or other basic estimates (e.g. regression coefficient) AND variation (e.g. standard deviation) or associated estimates of uncertainty (e.g. confidence intervals)
- For null hypothesis testing, the test statistic (e.g.  $F$ ,  $t$ ,  $r$ ) with confidence intervals, effect sizes, degrees of freedom and  $P$  value noted  
*Give  $P$  values as exact values whenever suitable.*
- For Bayesian analysis, information on the choice of priors and Markov chain Monte Carlo settings
- For hierarchical and complex designs, identification of the appropriate level for tests and full reporting of outcomes
- Estimates of effect sizes (e.g. Cohen's  $d$ , Pearson's  $r$ ), indicating how they were calculated

*Our web collection on [statistics for biologists](#) contains articles on many of the points above.*

### Software and code

Policy information about [availability of computer code](#)

Data collection

Data analysis

For manuscripts utilizing custom algorithms or software that are central to the research but not yet described in published literature, software must be made available to editors and reviewers. We strongly encourage code deposition in a community repository (e.g. GitHub). See the Nature Portfolio [guidelines for submitting code & software](#) for further information.

### Data

Policy information about [availability of data](#)

All manuscripts must include a [data availability statement](#). This statement should provide the following information, where applicable:

- Accession codes, unique identifiers, or web links for publicly available datasets
- A description of any restrictions on data availability
- For clinical datasets or third party data, please ensure that the statement adheres to our [policy](#)

All relevant data supporting the findings of this study are provided in the main figures and Supplementary Information files, and are available from the corresponding author upon request. Source data accompanying this paper are provided as a Source Data file.

## Research involving human participants, their data, or biological material

Policy information about studies with [human participants or human data](#). See also policy information about [sex, gender \(identity/presentation\), and sexual orientation](#) and [race, ethnicity and racism](#).

|                                                                    |    |
|--------------------------------------------------------------------|----|
| Reporting on sex and gender                                        | na |
| Reporting on race, ethnicity, or other socially relevant groupings | na |
| Population characteristics                                         | na |
| Recruitment                                                        | na |
| Ethics oversight                                                   | na |

Note that full information on the approval of the study protocol must also be provided in the manuscript.

## Field-specific reporting

Please select the one below that is the best fit for your research. If you are not sure, read the appropriate sections before making your selection.

Life sciences     Behavioural & social sciences     Ecological, evolutionary & environmental sciences

For a reference copy of the document with all sections, see [nature.com/documents/nr-reporting-summary-flat.pdf](https://www.nature.com/documents/nr-reporting-summary-flat.pdf)

## Life sciences study design

All studies must disclose on these points even when the disclosure is negative.

|                 |                                                                                                                                                                                                            |
|-----------------|------------------------------------------------------------------------------------------------------------------------------------------------------------------------------------------------------------|
| Sample size     | Sample sizes were chosen in accordance with the field/accepted literature.                                                                                                                                 |
| Data exclusions | Data were not excluded.                                                                                                                                                                                    |
| Replication     | Biological replicates were performed in most cases. In some situations where biological replicates were not performed, multiple experimental approaches or cell lines were used to verify reproducibility. |
| Randomization   | Samples were allocated at random.                                                                                                                                                                          |
| Blinding        | Blinding was used.                                                                                                                                                                                         |

## Behavioural & social sciences study design

All studies must disclose on these points even when the disclosure is negative.

|                   |    |
|-------------------|----|
| Study description | na |
| Research sample   | na |
| Sampling strategy | na |
| Data collection   | na |
| Timing            | na |
| Data exclusions   | na |
| Non-participation | na |
| Randomization     | na |

# Ecological, evolutionary & environmental sciences study design

All studies must disclose on these points even when the disclosure is negative.

|                          |    |
|--------------------------|----|
| Study description        | na |
| Research sample          | na |
| Sampling strategy        | na |
| Data collection          | na |
| Timing and spatial scale | na |
| Data exclusions          | na |
| Reproducibility          | na |
| Randomization            | na |
| Blinding                 | na |

Did the study involve field work?  Yes  No

## Field work, collection and transport

|                        |    |
|------------------------|----|
| Field conditions       | na |
| Location               | na |
| Access & import/export | na |
| Disturbance            | na |

## Reporting for specific materials, systems and methods

We require information from authors about some types of materials, experimental systems and methods used in many studies. Here, indicate whether each material, system or method listed is relevant to your study. If you are not sure if a list item applies to your research, read the appropriate section before selecting a response.

### Materials & experimental systems

- | n/a                                 | Involvement in the study                                  |
|-------------------------------------|-----------------------------------------------------------|
| <input type="checkbox"/>            | <input checked="" type="checkbox"/> Antibodies            |
| <input type="checkbox"/>            | <input checked="" type="checkbox"/> Eukaryotic cell lines |
| <input checked="" type="checkbox"/> | <input type="checkbox"/> Palaeontology and archaeology    |
| <input checked="" type="checkbox"/> | <input type="checkbox"/> Animals and other organisms      |
| <input checked="" type="checkbox"/> | <input type="checkbox"/> Clinical data                    |
| <input checked="" type="checkbox"/> | <input type="checkbox"/> Dual use research of concern     |
| <input checked="" type="checkbox"/> | <input type="checkbox"/> Plants                           |

### Methods

- | n/a                                 | Involvement in the study                           |
|-------------------------------------|----------------------------------------------------|
| <input checked="" type="checkbox"/> | <input type="checkbox"/> ChIP-seq                  |
| <input type="checkbox"/>            | <input checked="" type="checkbox"/> Flow cytometry |
| <input checked="" type="checkbox"/> | <input type="checkbox"/> MRI-based neuroimaging    |

## Antibodies

|                 |                                                        |
|-----------------|--------------------------------------------------------|
| Antibodies used | Antibody details are provided in Supplementary Data 2. |
| Validation      | Antibodies were validated prior to use in experiments. |

## Eukaryotic cell lines

Policy information about [cell lines and Sex and Gender in Research](#)

|                                                                      |                                                                                                         |
|----------------------------------------------------------------------|---------------------------------------------------------------------------------------------------------|
| Cell line source(s)                                                  | U-2 OS, HT1080, IICF/c. HT1080 6TG, HEK-293T cancer cell lines.<br>In house or from CellBank Australia. |
| Authentication                                                       | All cell lines were verified by STR profiling through CellBank Australia.                               |
| Mycoplasma contamination                                             | All cell lines were tested and clear for Mycoplasma by CellBank Australia.                              |
| Commonly misidentified lines<br>(See <a href="#">ICLAC</a> register) | na                                                                                                      |

## Palaeontology and Archaeology

|                                                                                                                                                 |    |
|-------------------------------------------------------------------------------------------------------------------------------------------------|----|
| Specimen provenance                                                                                                                             | na |
| Specimen deposition                                                                                                                             | na |
| Dating methods                                                                                                                                  | na |
| <input type="checkbox"/> Tick this box to confirm that the raw and calibrated dates are available in the paper or in Supplementary Information. |    |
| Ethics oversight                                                                                                                                | na |

Note that full information on the approval of the study protocol must also be provided in the manuscript.

## Animals and other research organisms

Policy information about [studies involving animals; ARRIVE guidelines](#) recommended for reporting animal research, and [Sex and Gender in Research](#)

|                         |    |
|-------------------------|----|
| Laboratory animals      | na |
| Wild animals            | na |
| Reporting on sex        | na |
| Field-collected samples | na |
| Ethics oversight        | na |

Note that full information on the approval of the study protocol must also be provided in the manuscript.

## Clinical data

Policy information about [clinical studies](#)

All manuscripts should comply with the ICMJE [guidelines for publication of clinical research](#) and a completed [CONSORT checklist](#) must be included with all submissions.

|                             |    |
|-----------------------------|----|
| Clinical trial registration | na |
| Study protocol              | na |
| Data collection             | na |
| Outcomes                    | na |

## Dual use research of concern

Policy information about [dual use research of concern](#)

### Hazards

Could the accidental, deliberate or reckless misuse of agents or technologies generated in the work, or the application of information presented in the manuscript, pose a threat to:

- | No                                  | Yes                                                 |
|-------------------------------------|-----------------------------------------------------|
| <input checked="" type="checkbox"/> | <input type="checkbox"/> Public health              |
| <input checked="" type="checkbox"/> | <input type="checkbox"/> National security          |
| <input checked="" type="checkbox"/> | <input type="checkbox"/> Crops and/or livestock     |
| <input checked="" type="checkbox"/> | <input type="checkbox"/> Ecosystems                 |
| <input checked="" type="checkbox"/> | <input type="checkbox"/> Any other significant area |

## Experiments of concern

Does the work involve any of these experiments of concern:

- | No                                  | Yes                                                                                                  |
|-------------------------------------|------------------------------------------------------------------------------------------------------|
| <input checked="" type="checkbox"/> | <input type="checkbox"/> Demonstrate how to render a vaccine ineffective                             |
| <input checked="" type="checkbox"/> | <input type="checkbox"/> Confer resistance to therapeutically useful antibiotics or antiviral agents |
| <input checked="" type="checkbox"/> | <input type="checkbox"/> Enhance the virulence of a pathogen or render a nonpathogen virulent        |
| <input checked="" type="checkbox"/> | <input type="checkbox"/> Increase transmissibility of a pathogen                                     |
| <input checked="" type="checkbox"/> | <input type="checkbox"/> Alter the host range of a pathogen                                          |
| <input checked="" type="checkbox"/> | <input type="checkbox"/> Enable evasion of diagnostic/detection modalities                           |
| <input checked="" type="checkbox"/> | <input type="checkbox"/> Enable the weaponization of a biological agent or toxin                     |
| <input checked="" type="checkbox"/> | <input type="checkbox"/> Any other potentially harmful combination of experiments and agents         |

## Plants

|                       |                                 |
|-----------------------|---------------------------------|
| Seed stocks           | <input type="text" value="na"/> |
| Novel plant genotypes | <input type="text" value="na"/> |
| Authentication        | <input type="text" value="na"/> |

## ChIP-seq

### Data deposition

- Confirm that both raw and final processed data have been deposited in a public database such as [GEO](#).
- Confirm that you have deposited or provided access to graph files (e.g. BED files) for the called peaks.

|                                                                            |                                 |
|----------------------------------------------------------------------------|---------------------------------|
| Data access links<br><small>May remain private before publication.</small> | <input type="text" value="na"/> |
| Files in database submission                                               | <input type="text" value="na"/> |
| Genome browser session<br><small>(e.g. <a href="#">UCSC</a>)</small>       | <input type="text" value="na"/> |

### Methodology

|                         |                                 |
|-------------------------|---------------------------------|
| Replicates              | <input type="text" value="na"/> |
| Sequencing depth        | <input type="text" value="na"/> |
| Antibodies              | <input type="text" value="na"/> |
| Peak calling parameters | <input type="text" value="na"/> |
| Data quality            | <input type="text" value="na"/> |

## Flow Cytometry

### Plots

Confirm that:

- The axis labels state the marker and fluorochrome used (e.g. CD4-FITC).
- The axis scales are clearly visible. Include numbers along axes only for bottom left plot of group (a 'group' is an analysis of identical markers).
- All plots are contour plots with outliers or pseudocolor plots.
- A numerical value for number of cells or percentage (with statistics) is provided.

### Methodology

|                           |                                          |
|---------------------------|------------------------------------------|
| Sample preparation        | Details included in the methods section. |
| Instrument                | BD FACSCanto (BD Biosciences)            |
| Software                  | FlowJo v5                                |
| Cell population abundance | 9800-10000                               |
| Gating strategy           | Dean-Jett                                |

Tick this box to confirm that a figure exemplifying the gating strategy is provided in the Supplementary Information.

## Magnetic resonance imaging

### Experimental design

|                                 |                                                                 |
|---------------------------------|-----------------------------------------------------------------|
| Design type                     | na                                                              |
| Design specifications           | na                                                              |
| Behavioral performance measures | na                                                              |
| Imaging type(s)                 | na                                                              |
| Field strength                  | na                                                              |
| Sequence & imaging parameters   | na                                                              |
| Area of acquisition             | na                                                              |
| Diffusion MRI                   | <input type="checkbox"/> Used <input type="checkbox"/> Not used |

### Preprocessing

|                            |    |
|----------------------------|----|
| Preprocessing software     | na |
| Normalization              | na |
| Normalization template     | na |
| Noise and artifact removal | na |
| Volume censoring           | na |

### Statistical modeling & inference

|                         |    |
|-------------------------|----|
| Model type and settings | na |
| Effect(s) tested        | na |

Specify type of analysis:  Whole brain  ROI-based  Both

Statistic type for inference

na

(See [Eklund et al. 2016](#))

Correction

na

## Models & analysis

n/a | Involved in the study

  Functional and/or effective connectivity  Graph analysis  Multivariate modeling or predictive analysis

Functional and/or effective connectivity

na

Graph analysis

na

Multivariate modeling and predictive analysis

na

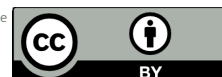

Supplement: 41467_2024_46578_MOESM6_ESM.pdf [file 41467_2024_46578_MOESM6_ESM.pdf]
