# Supplementary material for: ZNF827 is a single-stranded DNA binding protein that regulates the ATR-CHK1 DNA damage response pathway
Source: PubMed Central journal article supplement (PMC10933417; doi:10.1038/s41467-024-46578-0), 2024-03-12
Supplement: 41467_2024_46578_MOESM1_ESM.pdf [file 41467_2024_46578_MOESM1_ESM.pdf]

### Supplementary Figure 1.

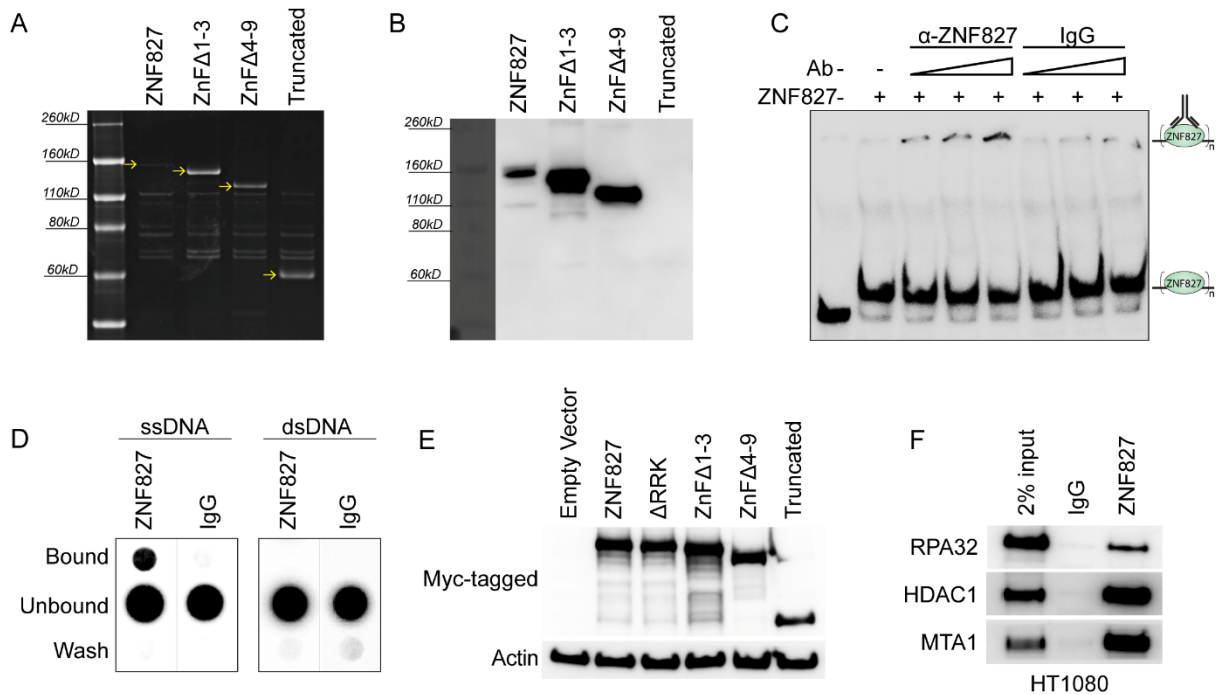

**Supplementary Figure 1. ZNF827 protein expression and purification. Related to Figure 1.** Protein purification in HEK 293T cells transfected for 48 h with HaloTag® ZNF827 and ZNF827 ZnF mutant constructs. **(A)** Coomassie gel of purified untagged ZNF827 and ZNF827 ZnF mutants after protein purification by HaloTag®. **(B)** Western blot analysis of purified untagged ZNF827 and ZNF827 ZnF mutants after protein purification by HaloTag®. The truncated mutant could not be detected by the ZNF827 antibody due to loss of epitope. **(C)** Super-shift electrophoretic mobility shift assay (EMSA) using  $\gamma$ -<sup>32</sup>P radiolabelled single-stranded pentaprobe incubated with purified ZNF827 protein and up to 1.8  $\mu$ g of either IgG control or ZNF827 antibody. **(D)** Detection of immunoprecipitated DNA using  $\gamma$ -<sup>32</sup>P radiolabelled probe following incubation of single-stranded or double-stranded pentaprobe with purified ZNF827 and immunoprecipitation with direct ZNF827 antibody or IgG control. **(E)** Western blot analysis of Myc-tagged ZNF827 and ZNF827 ZnF mutant proteins in U-2 OS ZNF827 knockout cells 48 h after transfection. **(F)** Western blot analysis of RPA32 and NuRD components HDAC1 and MTA1, following co-IP with a direct ZNF827 antibody in HT1080 cells overexpressing ZNF827. Source data are provided in the accompanying Source Data file.

**Supplementary Figure 2.**

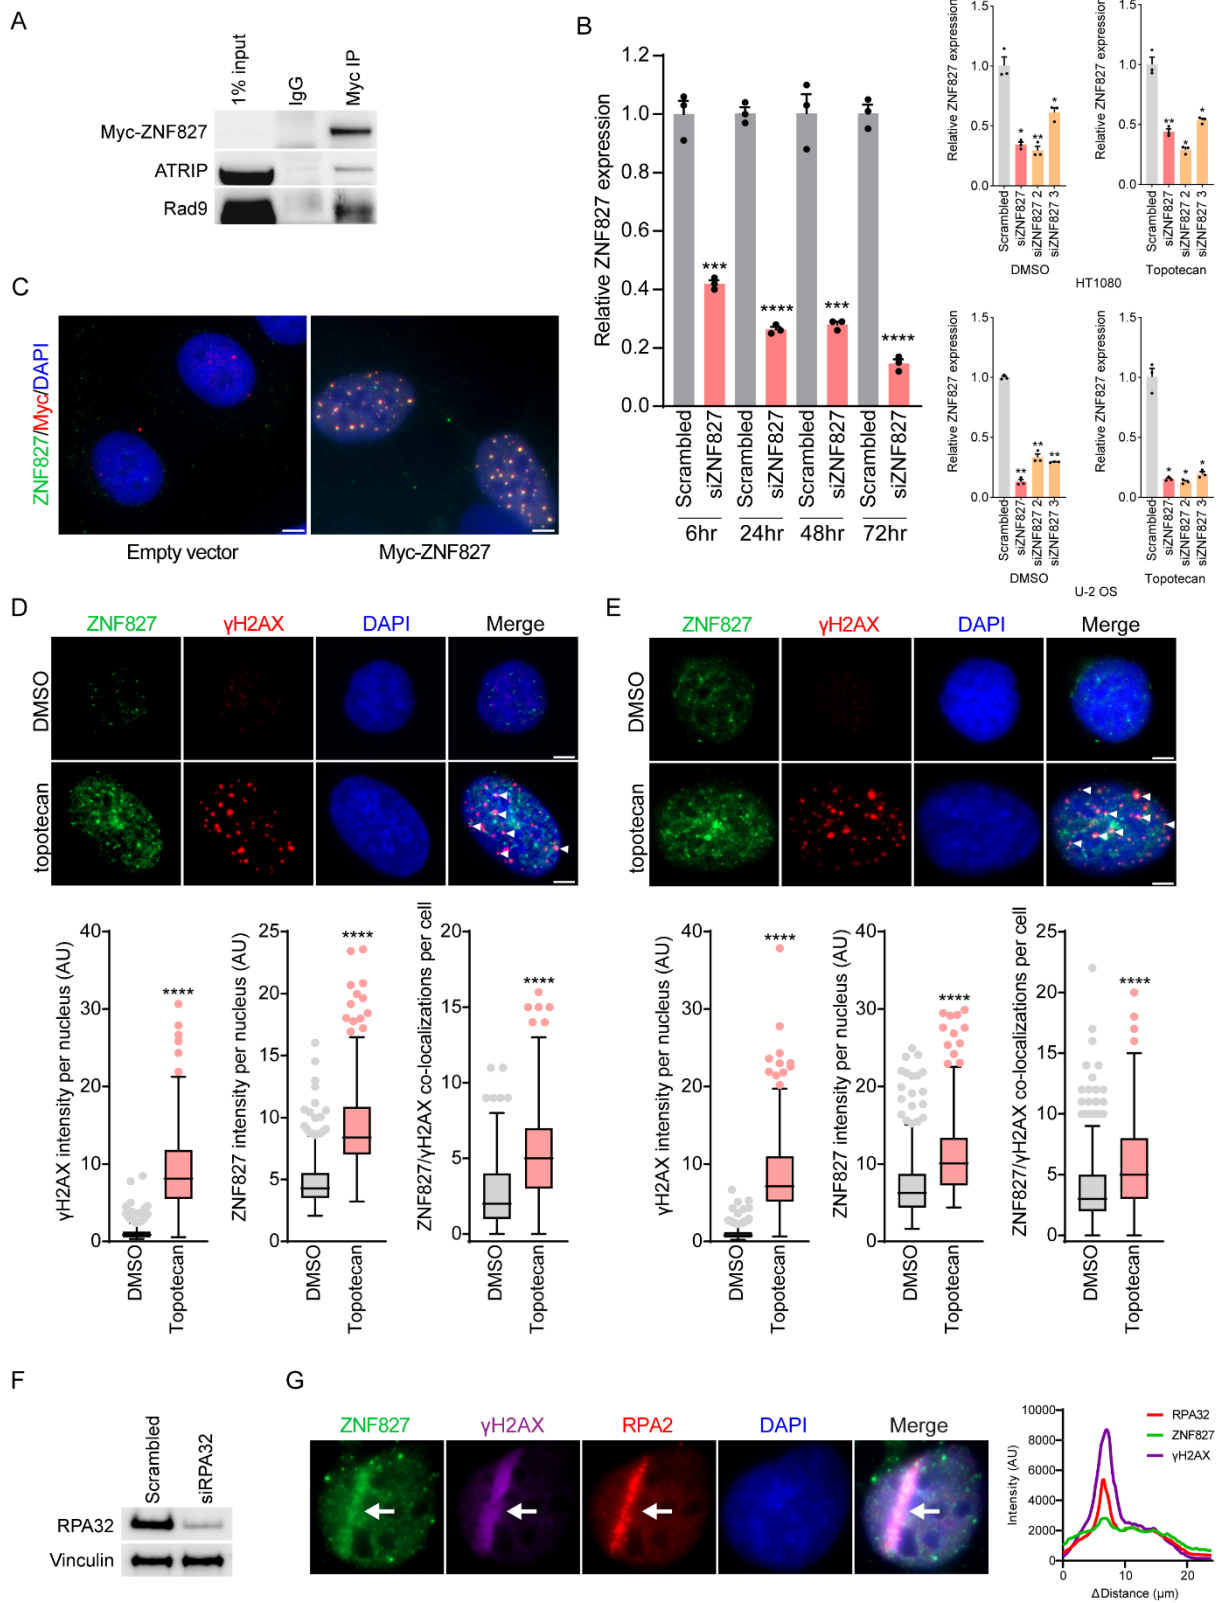

**Supplementary Figure 2. ZNF827 localizes to DNA damage sites. Related to Figure 2. (A)** Western blot of ATRIP, Rad9 and Myc following treatment with benzonase and co-immunoprecipitation (co-IP)

in U-2 OS cells overexpressing Myc-tagged ZNF827. **(B)** qRT-PCR validation of ZNF827 knockdown at 6, 24, 48 and 72 h post siRNA transfection in U-2 OS cells (left panel). qRT-PCR validation of ZNF827 knockdown 72 h post siRNA transfection using three different ZNF827 siRNAs in U-2 OS and HT1080 cells (right panel). Data normalised to scrambled controls and presented as mean + SEM; \*  $P < 0.01$ ; \*\*  $P < 0.005$ ; \*\*\*  $P < 0.0002$ ; \*\*\*\*  $P < 0.0001$  by two tailed  $t$  test. **(C)** Representative images showing ZNF827 antibody verification by immunofluorescence in U-2 OS cells overexpressing Myc-tagged ZNF827. **(D)** Representative images of  $\gamma$ H2AX (red) and endogenous ZNF827 (green) foci in HT1080 cells (top panel). White arrows indicate colocalizations. Scale bar represents 5  $\mu$ m. Quantitation of  $\gamma$ H2AX integrated intensity per nucleus, ZNF827 integrated intensity per nucleus, and  $\gamma$ H2AX and ZNF827 colocalizations per nucleus (bottom panel). Out of two independent experiments,  $n=494$  DMSO and  $n=334$  topotecan treated cells were assayed using CellProfiler. At least 50% overlap criterion was applied for colocalization count. Data are presented as Tukey box plots; \*\*\*\*  $P < 0.0001$  by Mann-Whitney tests. **(E)** Representative images of  $\gamma$ H2AX (red) and endogenous ZNF827 (green) foci in HT1080 6TG cells (top panel). White arrows indicate colocalizations. Scale bar represents 5  $\mu$ m. Quantitation of  $\gamma$ H2AX integrated intensity per nucleus, ZNF827 integrated intensity per nucleus, and  $\gamma$ H2AX and ZNF827 colocalizations per nucleus (bottom panel). Out of two independent experiments,  $n=554$  DMSO and  $n=261$  topotecan treated cells were assayed using CellProfiler. At least 50% overlap criterion was applied for colocalization count. Data are presented as Tukey box plots; \*\*\*\*  $P < 0.0001$  by Mann-Whitney tests. **(F)** Western blot analysis of RPA32 in U-2 OS cells 72 h post RPA32 knockdown. **(G)** Representative images showing colocalizations of laser stripes of ZNF827 (green),  $\gamma$ H2AX (purple) and RPA32 (red) in HT1080 cells (left panel). Corresponding intensity profile of ZNF827 (green),  $\gamma$ H2AX (purple) and RPA32 (red) (right panel). Profile generated using ZEN (Zeiss) software. Source data are provided in the Source Data file.

**Supplementary Figure 3.**

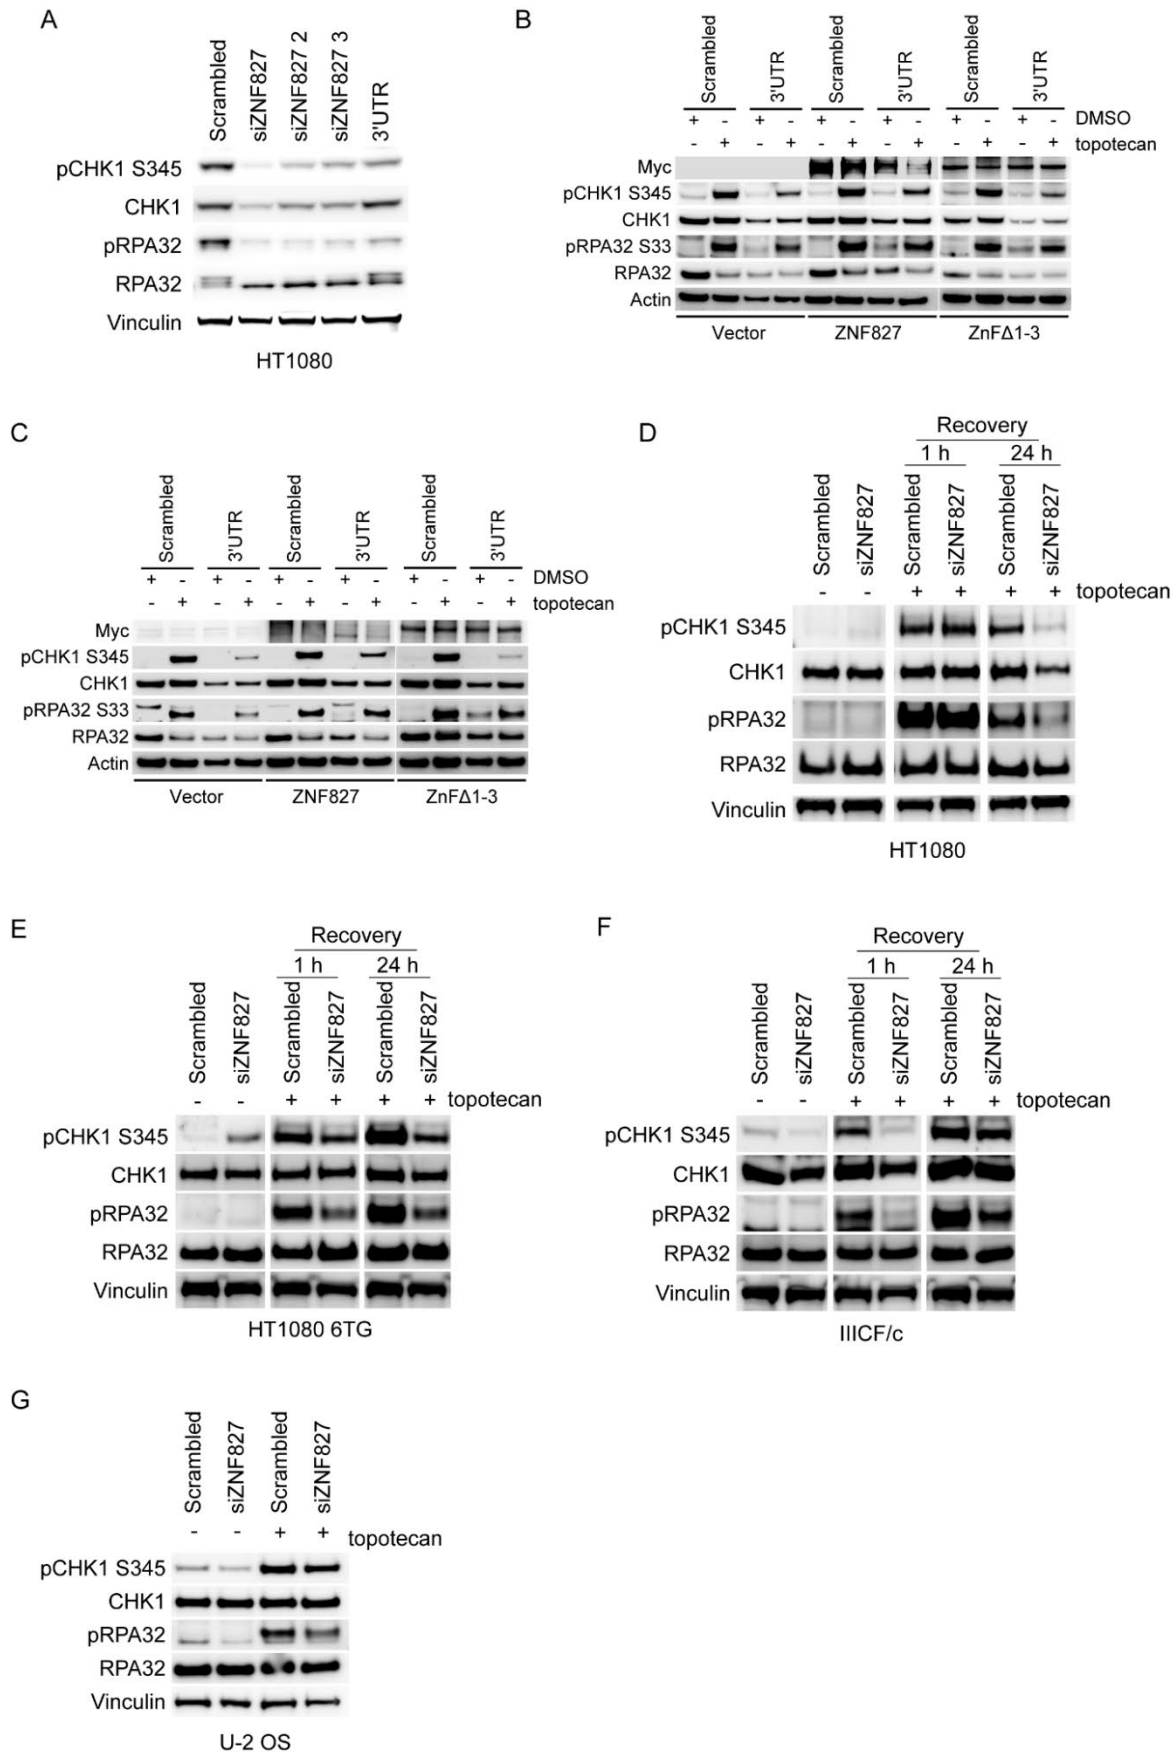

**Supplementary Figure 3. ZNF827 depletion abrogates ATR signalling. Related to Figure 3. (A)**

Western blot analysis of pCHK1 (S345), total CHK1, pRPA32 (S33) and total RPA32 in HT1080 cells 72 h post ZNF827 knockdown with three different siRNAs, an siRNA targeting the 3' UTR of ZNF827, and a scrambled siRNA control. Vinculin used as a loading control. **(B, C)** Replicate western blot analysis of Myc, pCHK1 (S345), total CHK1, pRPA32 (S33) and total RPA32 in U-2 OS cells stably expressing Myc-tagged ZNF827, Myc-tagged ZNF827 ZnFΔ1-3 or vector control. Endogenous ZNF827 was depleted using a ZNF827 3' UTR siRNA and a scrambled siRNA was used as a control. 72 h after the addition of siRNA, cells were treated with 2 µg/mL topotecan or DMSO followed by 1 h recovery. Actin used as a loading control. **(D)** Western blot analysis of pCHK1 (S345), total CHK1, pRPA32 (S33) and total RPA32 in HT1080 cells 72 h post ZNF827 knockdown, including 1 h treatment with 2 µg/mL topotecan or DMSO followed by 1 h or 24 h recovery. Vinculin used as a loading control. **(E)** Western blot analysis of pCHK1 (S345), total CHK1, pRPA32 (S33) and total RPA32 in HT1080 6TG cells 72 h post ZNF827 knockdown, including 1 h treatment with 2 µg/mL topotecan or DMSO followed by 1 h or 24 h recovery. Vinculin used as a loading control. **(F)** Western blot analysis of pCHK1 (S345), total CHK1, pRPA32 (S33) and total RPA32 in IICF/c cells 72 h post ZNF827 knockdown, including 1 h treatment with 2 µg/mL topotecan or DMSO followed by 1 h or 24 h recovery. Vinculin used as a loading control. **(G)** Western blot analysis of pCHK1 (S345), total CHK1, pRPA32 (S33) and total RPA32 in U-2 OS cells, 24 h post transfection with ZNF827 siRNA, including 1 h incubation with 2 µg/mL topotecan or DMSO followed by 1 h recovery. Source data are provided in the accompanying Source Data file.

**Supplementary Table 1: Mass spectrometry analysis of ZNF827 pulldown by HaloTag®**

| Accession   | Description                                                                                          | Sequence coverage | Score | Num. of sequences |
|-------------|------------------------------------------------------------------------------------------------------|-------------------|-------|-------------------|
| ZN827_HUMAN | Zinc finger protein 827 OS=Homo sapiens GN=ZNF827 PE=1 SV=1                                          | 0.46              | 4478  | 36                |
| AP2A2_HUMAN | AP-2 complex subunit alpha-2 OS=Homo sapiens GN=AP2A2 PE=1 SV=2                                      | 0.05              | 110   | 2                 |
| CH60_HUMAN  | 60 kDa heat shock protein, mitochondrial OS=Homo sapiens GN=HSPD1 PE=1 SV=2                          | 0.09              | 90    | 3                 |
| RLA2_HUMAN  | 60S acidic ribosomal protein P2 OS=Homo sapiens GN=RPLP2 PE=1 SV=1                                   | 0.17              | 83    | 2                 |
| MIF_HUMAN   | Macrophage migration inhibitory factor OS=Homo sapiens GN=MIF PE=1 SV=4                              | 0.08              | 74    | 1                 |
| TBA1A_HUMAN | Tubulin alpha-1A chain OS=Homo sapiens GN=TUBA1A PE=1 SV=1                                           | 0.03              | 63    | 1                 |
| RS27A_HUMAN | Ubiquitin-40S ribosomal protein S27a OS=Homo sapiens GN=RPS27A PE=1 SV=2                             | 0.1               | 63    | 1                 |
| VWA8_HUMAN  | von Willebrand factor A domain-containing protein 8 OS=Homo sapiens GN=VWA8 PE=1 SV=2                | 0.01              | 35    | 1                 |
| H2B1B_HUMAN | Histone H2B type 1-B OS=Homo sapiens GN=HIST1H2BB PE=1 SV=2                                          | 0.12              | 35    | 1                 |
| MELT_HUMAN  | Ventricular zone-expressed PH domain-containing protein homolog 1 OS=Homo sapiens GN=VEPH1 PE=2 SV=1 | 0.01              | 34    | 1                 |
| STX11_HUMAN | Syntaxin-11 OS=Homo sapiens GN=STX11 PE=1 SV=1                                                       | 0.02              | 31    | 1                 |
| CLCF1_HUMAN | Cardiotrophin-like cytokine factor 1 OS=Homo sapiens GN=CLCF1 PE=1 SV=1                              | 0.04              | 28    | 1                 |
| L2GL1_HUMAN | Lethal(2) giant larvae protein homolog 1 OS=Homo sapiens GN=LLGL1 PE=1 SV=3                          | 0.01              | 26    | 1                 |
| EGF_HUMAN   | Pro-epidermal growth factor OS=Homo sapiens GN=EGF PE=1 SV=2                                         | 0.03              | 23    | 1                 |
| SMCA2_HUMAN | Probable global transcription activator SNF2L2 OS=Homo sapiens GN=SMARCA2 PE=1 SV=2                  | 0.02              | 22    | 1                 |
| TX13C_HUMAN | Testis-expressed sequence 13C protein OS=Homo sapiens GN=TEX13C PE=5 SV=1                            | 0.04              | 22    | 1                 |
| NAA15_HUMAN | N-alpha-acetyltransferase 15, NatA auxiliary subunit OS=Homo sapiens GN=NAA15 PE=1 SV=1              | 0.04              | 21    | 1                 |
| ITA2B_HUMAN | Integrin alpha-IIb OS=Homo sapiens GN=ITGA2B PE=1 SV=3                                               | 0.02              | 21    | 1                 |
| CCD57_HUMAN | Coiled-coil domain-containing protein 57 OS=Homo sapiens GN=CCDC57 PE=1 SV=2                         | 0.01              | 19    | 1                 |
| KLRB1_HUMAN | Killer cell lectin-like receptor subfamily B member 1 OS=Homo sapiens GN=KLRB1 PE=1 SV=1             | 0.04              | 19    | 1                 |
| GEMI_HUMAN  | Geminin OS=Homo sapiens GN=GMNN PE=1 SV=1                                                            | 0.04              | 18    | 1                 |
| VIME_HUMAN  | Vimentin OS=Homo sapiens GN=VIM PE=1 SV=4                                                            | 0.04              | 17    | 1                 |
| COLA1_HUMAN | Collagen alpha-1(XXI) chain OS=Homo sapiens GN=COL21A1 PE=2 SV=1                                     | 0.02              | 16    | 1                 |
| PTH2R_HUMAN | Parathyroid hormone 2 receptor OS=Homo sapiens GN=PTH2R PE=1 SV=1                                    | 0.01              | 16    | 1                 |
| IGS10_HUMAN | Immunoglobulin superfamily member 10 OS=Homo sapiens GN=IGSF10 PE=2 SV=1                             | 0                 | 16    | 1                 |
| RM15_HUMAN  | 39S ribosomal protein L15, mitochondrial OS=Homo sapiens GN=MRPL15 PE=1 SV=1                         | 0.05              | 16    | 1                 |
| CCNI_HUMAN  | Cyclin-I OS=Homo sapiens GN=CCNI PE=2 SV=1                                                           | 0.04              | 16    | 1                 |
| EVL_HUMAN   | Ena/VASP-like protein OS=Homo sapiens GN=EVL PE=1 SV=2                                               | 0.03              | 15    | 1                 |
| BUB1B_HUMAN | Mitotic checkpoint serine/threonine-protein kinase BUB1 beta OS=Homo sapiens GN=BUB1B PE=1 SV=3      | 0.01              | 15    | 1                 |
| SPEF2_HUMAN | Sperm flagellar protein 2 OS=Homo sapiens GN=SPEF2 PE=2 SV=2                                         | 0                 | 15    | 1                 |
| SOX18_HUMAN | Transcription factor SOX-18 OS=Homo sapiens GN=SOX18 PE=1 SV=2                                       | 0.04              | 14    | 1                 |
| FBX16_HUMAN | F-box only protein 16 OS=Homo sapiens GN=FBXO16 PE=2 SV=1                                            | 0.06              | 14    | 1                 |

**Supplementary Table 2 – List of antibodies**

| <b>Target</b>                | <b>Species</b> | <b>Manufacturer</b> | <b>Catalogue No.</b> | <b>Dilution</b>                                                                       |
|------------------------------|----------------|---------------------|----------------------|---------------------------------------------------------------------------------------|
| <b>Actin</b>                 | Rabbit         | Sigma               | A2066                | <b>WB:</b> 1:5000 in PBST                                                             |
| <b>ATR</b>                   | Rabbit         | CST                 | 2790S                | <b>WB:</b> 1:500 in PBST                                                              |
| <b>ATRIP</b>                 | Rabbit         | CST                 | 2737                 | <b>WB:</b> 1:1000 in PBST                                                             |
| <b>BrdU</b>                  | Rat            | Abcam               | Ab6326               | <b>IF:</b> 1:500 in ABDIL                                                             |
| <b>BRCA1</b>                 | Mouse          | GenTex              | GTX70111             | <b>IF:</b> 1:500 in ABDIL                                                             |
| <b>CHK1</b>                  | Mouse          | CST                 | 2360                 | <b>WB:</b> 1:1000 in PBST                                                             |
| <b>ETAA1</b>                 | Rabbit         | Abcam               | ab197017             | <b>WB:</b> 1:1000 in PBST                                                             |
| <b>HDAC1</b>                 | Rabbit         | CST                 | 2062S                | <b>WB:</b> 1:1000 in PBST                                                             |
| <b>IgG2a Isotype control</b> | Mouse          | CST                 | 61656                | <b>IP:</b> 2.5ug per sample                                                           |
| <b>MTA1</b>                  | Rabbit         | Abcam               | ab71153              | <b>WB:</b> 1:1000 in PBST                                                             |
| <b>Myc-tag</b>               | Mouse          | CST                 | 2276S                | <b>WB:</b> 1:1000 in PBST<br><b>IF:</b> 1:500 in ABDIL<br><b>IP:</b> 2.5ug per sample |
| <b>p21</b>                   | Rabbit         | CST                 | 2947S                | <b>WB:</b> 1:1000 in PBST                                                             |
| <b>p53</b>                   | Mouse          | CST                 | 2524S                | <b>WB:</b> 1:1000 in PBST                                                             |
| <b>pCHK1 S345</b>            | Rabbit         | CST                 | 2348S                | <b>WB:</b> 1:1000 in TBST                                                             |
| <b>pRPA32 S33</b>            | Rabbit         | Bethyl Laboratories | A300-246A            | <b>WB:</b> 1:1000 in TBST<br><b>IF:</b> 1:500 in ABDIL                                |
| <b>Rad9</b>                  | Rabbit         | Abcam               | ab70810              | <b>WB:</b> 1:1000 in PBST                                                             |
| <b>RBBP4</b>                 | Rabbit         | Abcam               | ab1765               | <b>WB:</b> 1:1000 in PBST                                                             |
| <b>RPA32</b>                 | Mouse          | Abcam               | ab2175               | <b>WB:</b> 1:1000 in PBST                                                             |
| <b>RPA70</b>                 | Rabbit         | Abcam               | ab79398              | <b>WB:</b> 1:1000 in PBST                                                             |
| <b>TOPBP1</b>                | Rabbit         | Abcam               | Ab2402               | <b>WB:</b> 1:1000 in PBST<br><b>IF:</b> 1:500 in ABDIL                                |
| <b>Vinculin</b>              | Mouse          | Sigma-Merck         | V9131                | <b>WB:</b> 1:10 000 in PBST                                                           |
| <b>ZNF827</b>                | Goat           | Santa Cruz          | T-20                 | <b>WB:</b> 1:500 in PBST<br><b>IF:</b> 1:2500 in ABDIL                                |
| <b>γH2AX S139</b>            | Rabbit         | Abcam               | Ab2893               | <b>WB:</b> 1:1000 in PBST<br><b>IF:</b> 1:500 in ABDIL                                |
